# Supplementary material
Source: ML conference proceedings conference paper supplement (https://openreview.net/forum?id=7Uix1eQZ8z)
Supplement: supplementary_material [file attachment]

## Appendix: A State Representation for Diminishing Rewards

GIFs of navigation agents can be found at [lambda-representation.github.io](https://github.com/lambda-representation) and in the supplementary material.

### A Derivation of $\lambda$ R Recursion

We provide a step-by-step derivation of the  $\lambda$ R recursion in Eq. (4.3):

$$\begin{aligned}
\Phi_\lambda^\pi(s, s') &= \mathbb{E} \left[ \sum_{k=0}^{\infty} \lambda^{n_t(s', k)} \gamma^k \mathbb{1}(s_{t+k} = s') \middle| s_t = s \right] \\
&= \mathbb{E} \left[ \mathbb{1}(s_t = s') + \sum_{k=1}^{\infty} \lambda^{n_t(s', k)} \gamma^k \mathbb{1}(s_{t+k} = s') \middle| s_t = s \right] \\
&\stackrel{(i)}{=} \mathbb{E} \left[ \mathbb{1}(s_t = s') + \lambda^{n_t(s', 1)} \gamma \sum_{k=1}^{\infty} \lambda^{n_{t+1}(s', k)} \gamma^{k-1} \mathbb{1}(s_{t+k} = s') \middle| s_t = s \right] \\
&\stackrel{(ii)}{=} \mathbb{E} \left[ \mathbb{1}(s_t = s') + \mathbb{1}(s_t = s') \lambda \gamma \sum_{k=1}^{\infty} \lambda^{n_{t+1}(s', k)} \gamma^{k-1} \mathbb{1}(s_{t+k} = s') \right. \\
&\quad \left. + \gamma(1 - \mathbb{1}(s_t = s')) \sum_{k=1}^{\infty} \lambda^{n_{t+1}(s', k)} \gamma^{k-1} \mathbb{1}(s_{t+k} = s') \middle| s_t = s \right] \\
&= \mathbb{1}(s_t = s') + \mathbb{1}(s_t = s') \lambda \gamma \mathbb{E}_{s_{t+1} \sim p^\pi} \Phi_\lambda^\pi(s_{t+1}, s') + \gamma(1 - \mathbb{1}(s_t = s')) \mathbb{E}_{s_{t+1} \sim p^\pi} \Phi_\lambda^\pi(s_{t+1}, s') \\
&= \mathbb{1}(s_t = s') (1 + \gamma \lambda \mathbb{E}_{s_{t+1} \sim p^\pi} \Phi_\lambda^\pi(s_{t+1}, s')) + \gamma(1 - \mathbb{1}(s_t = s')) \mathbb{E}_{s_{t+1} \sim p^\pi} \Phi_\lambda^\pi(s_{t+1}, s'), \\
&\tag{A.1}
\end{aligned}$$

where (i) is because  $n_t(s', k) = n_t(s', 1) + n_{t+1}(s', k)$  and (ii) is because

$$\lambda^{n_t(s', 1)} = \lambda^{\mathbb{1}(s_t = s')} = \mathbb{1}(s_t = s') \lambda + (1 - \mathbb{1}(s_t = s')).$$

### B Theoretical Analysis

Here, we provide proofs for the theoretical results in the main text.

**Lemma 3.1** (Bellman Impossibility). *Given a reward function of the form Eq. (3.1), it is impossible to define a Bellman equation solely using the resulting value function and immediate reward.*

*Proof.* We have

$$\begin{aligned}
V^\pi(s) &= \mathbb{E} \left[ \sum_{k=0}^{\infty} \gamma^k r_\lambda(s_{t+k}, k) \middle| s_t = s \right] \\
&= \bar{\mathbf{r}}^\top \mathbb{E} \left[ \sum_{k=0}^{\infty} \gamma^k \lambda^{n_t(s_{t+k}, k)} \mathbf{1}(s_{t+k}) \middle| s_t = s \right] \\
&= \bar{\mathbf{r}}^\top [\mathbf{1}(s_t) \odot (1 + \gamma \lambda \mathbb{E}_{p^\pi} [\Phi_\lambda^\pi(s_{t+1})]) + \gamma(1 - \mathbf{1}(s_t)) \odot \mathbb{E}_{p^\pi} [\Phi_\lambda^\pi(s_{t+1})]] \\
&= \bar{r}(s_t) + \gamma \mathbb{E}_{p^\pi} [V^\pi(s_{t+1})] + \gamma(\lambda - 1) \bar{r}(s_t) \mathbb{E}_{p^\pi} [\Phi_\lambda^\pi(s_{t+1}, s_t)]
\end{aligned}$$

418 The additional term in **red** cannot be eliminated, and is generated by the elementwise  
 419 product by the one-hot vector  $\mathbf{1}(s_t)$ , which prevents the associated inner products  
 420 between  $\bar{\mathbf{r}}$  and  $\Phi_\lambda^\pi(s_{t+1})$  from producing  $V^\pi(s_{t+1})$ .  $\square$

421 The following establishes  $\mathcal{G}_\lambda^\pi$  as a contraction.

422 **Lemma B.1** (Contraction). *Let  $\mathcal{G}_\lambda^\pi$  be the operator as defined in Definition 4.2 for*  
 423 *some stationary policy  $\pi$ . Then for any two matrices  $\Phi, \Phi' \in \mathbb{R}^{|S| \times |S|}$ ,*

$$|\mathcal{G}_\lambda^\pi \Phi(s, s') - \mathcal{G}_\lambda^\pi \Phi'(s, s')| \leq \gamma |\Phi(s, s') - \Phi'(s, s')|.$$

424 *Proof.* We have

$$\begin{aligned} |(\mathcal{G}_\lambda^\pi \Phi - \mathcal{G}_\lambda^\pi \Phi')_{s,s'}| &= |(I \odot (\mathbf{1}\mathbf{1}^\top + \gamma\lambda P^\pi \Phi) + \gamma(\mathbf{1}\mathbf{1}^\top - I) \odot P^\pi \Phi \\ &\quad - I \odot (\mathbf{1}\mathbf{1}^\top + \gamma\lambda P^\pi \Phi') - \gamma(\mathbf{1}\mathbf{1}^\top - I) \odot P^\pi \Phi')_{s,s'}| \\ &= |(I \odot \gamma\lambda P^\pi (\Phi - \Phi') + \gamma(\mathbf{1}\mathbf{1}^\top - I) \odot P^\pi (\Phi - \Phi'))_{s,s'}| \\ &= |((I \odot \lambda\mathbf{1}\mathbf{1}^\top + \mathbf{1}\mathbf{1}^\top - I) \odot \gamma P^\pi (\Phi - \Phi'))_{s,s'}| \\ &\stackrel{(i)}{\leq} |(\gamma P^\pi (\Phi - \Phi'))_{s,s'}| \\ &= \gamma |(P^\pi (\Phi - \Phi'))_{s,s'}| \\ &\leq \gamma |(\Phi - \Phi')_{s,s'}|, \end{aligned}$$

425 where (i) comes from using  $\lambda \leq 1$  and simplifying.  $\square$

426 Note that we can actually get a tighter contraction factor of  $\lambda\gamma$  for  $s = s'$ . Given  
 427 this contractive property, we can prove its convergence with the use of the following  
 428 lemma.

429 **Lemma B.2** (Max  $\lambda R$ ). *The maximum possible value of  $\Phi_\lambda^\pi(s, s')$  is*

$$\frac{\mathbb{1}(s = s') + (1 - \mathbb{1}(s = s'))\gamma}{1 - \lambda\gamma}.$$

430 *Proof.* For  $s = s'$ ,

$$\Phi_\lambda^\pi(s, s) = 1 + \lambda\gamma \mathbb{E}_{s_{t+1} \sim p^\pi(\cdot|s_t)} \Phi_\lambda^\pi(s_{t+1}, s).$$

431 This is just the standard SR recursion with discount factor  $\lambda\gamma$ , so the maximum is

$$\sum_{k=0}^{\infty} (\lambda\gamma)^k = \frac{1}{1 - \lambda\gamma}. \quad (\text{B.1})$$

432 For  $s \neq s'$ ,  $\mathbb{1}(s_t = s') = 0$ , so

$$\Phi_\lambda^\pi(s, s') = \gamma \mathbb{E}_{s_{t+1} \sim p^\pi(\cdot|s_t)} \Phi_\lambda^\pi(s_{t+1}, s').$$

433 Observe that  $\Phi_\lambda^\pi(s, s) \geq \Phi_\lambda^\pi(s, s')$  for  $s' \neq s$ , so the maximum is attained for  
 434  $s_{t+1} = s'$ . We can then use the result for  $s = s'$  to get

$$\Phi_\lambda^\pi(s, s') = \gamma \left( \frac{1}{1 - \lambda\gamma} \right). \quad (\text{B.2})$$

435 Combining Eq. (B.1) and Eq. (B.2) yields the desired result.  $\square$

436 **Proposition 4.1** (Convergence). *Under the conditions assumed above, set  $\Phi^{(0)} =$*   
 437  *$(1 - \lambda)I$ . For  $k = 1, 2, \dots$ , suppose that  $\Phi^{(k+1)} = \mathcal{G}_\lambda^\pi \Phi^{(k)}$ . Then*

$$|(\Phi^{(k)} - \Phi_\lambda^\pi)_{s,s'}| \leq \frac{\gamma^{k+1}}{1 - \lambda\gamma}.$$

438 *Proof.* Using the notation  $X_{s,s'} = X(s, s')$  for a matrix  $X$ :

$$\begin{aligned} |(\Phi^{(k)} - \Phi_\lambda^\pi)_{s,s'}| &= |(\mathcal{G}_\lambda^k \Phi^{(0)} - \mathcal{G}_\lambda^k \Phi_\lambda^\pi)_{s,s'}| \\ &= |(\mathcal{G}_\lambda^k \Phi^{(0)} - \Phi_\lambda^\pi)_{s,s'}| \\ &\stackrel{(i)}{\leq} \gamma^k |(\Phi^{(0)} - \Phi_\lambda^\pi)_{s,s'}| \\ &\stackrel{(ii)}{=} \gamma^k \Phi_\lambda^\pi(s, s') \\ &\stackrel{(iii)}{\leq} \frac{\gamma^{k+1}}{1 - \lambda\gamma} \end{aligned} \tag{B.3}$$

439 where (i) is due to Lemma B.1, (ii) is because  $\Phi^{(0)}(s, s') = 0$  for  $s \neq s'$ , and (iii)  
 440 is due to Lemma B.2.  $\square$

441 **Lemma B.3** (Subadditivity). *For any  $s \in \mathcal{S}$ , policy  $\pi$ ,  $\lambda \in [0, 1)$ , and disjoint*  
 442 *measurable sets  $A, B \subseteq \mathcal{S}$ ,*

$$\Phi_\lambda^\pi(s, A \cup B) < \Phi_\lambda^\pi(s, A) + \Phi_\lambda^\pi(s, B).$$

443 *Proof.* Note that for disjoint sets  $A, B$ , we have  $n_t(A \cup B, k) = n_t(A, k) + n_t(B, k)$ .  
 444 Hence, conditioned on some policy  $\pi$  and  $s_t = s$ ,

$$\begin{aligned} \lambda^{n_t(A \cup B, k)} \mathbb{P}(s_{t+k} \in A \cup B) &= \lambda^{n_t(A, k)} \lambda^{n_t(B, k)} \mathbb{P}(s_{t+k} \in A) + \lambda^{n_t(A, k)} \lambda^{n_t(B, k)} \mathbb{P}(s_{t+k} \in B) \\ &\leq \lambda^{n_t(A, k)} \mathbb{P}(s_{t+k} \in A) + \lambda^{n_t(B, k)} \mathbb{P}(s_{t+k} \in B), \end{aligned}$$

445 where the first line follows from  $\mathbb{P}(s_{t+k} \in A \cup B) = \mathbb{P}(s_{t+k} \in A) + \mathbb{P}(s_{t+k} \in B)$ .  
 446 Equality holds over all  $A, B, t, k$  if and only if  $\lambda = 1$ . Summing over  $k$  yields the  
 447 result.  $\square$

#### 448 B.1 Proof of Theorem 5.1

449 We first prove two results, which rely throughout on the fact that  $\Phi_\lambda(s, a, s') \leq \frac{1}{1 - \lambda\gamma}$   
 450 for all  $s, a, s'$ , which follows from Lemma B.2. For simplicity, we also assume  
 451 throughout that all rewards are non-negative, but this assumption can easily be  
 452 dropped by taking absolute values of rewards. The proofs presented here borrow  
 453 ideas from those of [16].

454 **Lemma B.4.** *Let  $\{M_j\}_{j=1}^n \subseteq \mathcal{M}$  and  $M \in \mathcal{M}$  be a set of tasks in an environment  $\mathcal{M}$*   
 455 *with diminishing rate  $\lambda$  and let  $Q^{\pi_j^*}$  denote the action-value function of an optimal*  
 456 *policy of  $M_j$  when executed in  $M$ . Given estimates  $\tilde{Q}^{\pi_j}$  such that  $\|Q^{\pi_j^*} - \tilde{Q}^{\pi_j}\|_\infty \leq \epsilon$*   
 457 *for all  $j$ , define*

$$\pi(s) \in \operatorname{argmax}_a \max_j \tilde{Q}^{\pi_j}(s, a).$$

458 *Then,*

$$Q^\pi(s, a) \geq \max_j Q^{\pi_j^*}(s, a) - \frac{1}{1 - \gamma} \left( 2\epsilon + \frac{\gamma(1 - \lambda)r(s, a)}{1 - \lambda\gamma} \right),$$

459 where  $r$  denotes the reward function of  $M$ .

460 *Proof.* Define  $\tilde{Q}_{\max}(s, a) := \max_j \tilde{Q}^{\pi_j}(s, a)$  and  $Q_{\max}(s, a) := \max_j Q^{\pi_j^*}(s, a)$ . Let  
 461  $T^\nu$  denote the Bellman operator of a policy  $\nu$  in task  $M$ . For all  $(s, a) \in \mathcal{S} \times \mathcal{A}$  and  
 462 all  $j$ ,

$$\begin{aligned}
 T_i^\pi \tilde{Q}_{\max}(s, a) &= r(s, a) + \gamma \sum_{s'} p(s'|s, a) \left( (\lambda - 1)r_i(s, a)\Phi^\pi(s', \pi(s'), s) + \tilde{Q}_{\max}(s', \pi(s')) \right) \\
 &= r(s, a) + \gamma \sum_{s'} p(s'|s, a) \left( (\lambda - 1)r_i(s, a)\Phi^\pi(s', \pi(s'), s) + \max_b \tilde{Q}_{\max}(s', b) \right) \\
 &\geq r(s, a) + \gamma \sum_{s'} p(s'|s, a) \left( (\lambda - 1)r_i(s, a)\Phi^\pi(s', \pi(s'), s) + \max_b Q_{\max}(s', b) \right) - \gamma\epsilon \\
 &\geq r(s, a) + \gamma \sum_{s'} p(s'|s, a) \left( (\lambda - 1)r_i(s, a)\Phi^\pi(s', \pi(s'), s) + Q_{\max}(s', \pi_j^*(s')) \right) - \gamma\epsilon \\
 &\geq r(s, a) + \gamma \sum_{s'} p(s'|s, a) \left( (\lambda - 1)r_i(s, a)\Phi^\pi(s', \pi(s'), s) + Q_i^{\pi_j^*}(s', \pi_j^*(s')) \right) - \gamma\epsilon \\
 &= r(s, a) + \gamma \sum_{s'} p(s'|s, a) \left( (\lambda - 1)r_i(s, a)\Phi^{\pi_j^*}(s', \pi_j^*(s'), s) + Q_i^{\pi_j^*}(s', \pi_j^*(s')) \right) - \gamma\epsilon \\
 &\quad + \gamma(\lambda - 1)r(s, a) \sum_{s'} p(s'|s, a) \left( \Phi^\pi(s', \pi(s'), s) - \Phi^{\pi_j^*}(s', \pi_j^*(s'), s) \right) \\
 &\geq T_i^{\pi_j^*} Q_i^{\pi_j^*}(s, a) - \gamma\epsilon - \frac{\gamma(1 - \lambda)r(s, a)}{1 - \lambda\gamma} \\
 &= Q_i^{\pi_j^*}(s, a) - \gamma\epsilon - \frac{\gamma(1 - \lambda)r(s, a)}{1 - \lambda\gamma}.
 \end{aligned}$$

463 This holds for any  $j$ , so

$$\begin{aligned}
 T^\pi \tilde{Q}_{\max}(s, a) &\geq \max_j Q_i^{\pi_j^*}(s, a) - \gamma\epsilon - \frac{\gamma(1 - \lambda)r(s, a)}{1 - \lambda\gamma} \\
 &= Q_{\max}(s, a) - \gamma\epsilon - \frac{\gamma(1 - \lambda)r(s, a)}{1 - \lambda\gamma} \\
 &\geq \tilde{Q}_{\max}(s, a) - \epsilon - \gamma\epsilon - \frac{\gamma(1 - \lambda)r(s, a)}{1 - \lambda\gamma}.
 \end{aligned}$$

464 Next, note that for any  $c \in \mathbb{R}$ ,

$$\begin{aligned}
 T^\pi(\tilde{Q}_{\max}(s, a) + c) &= T^\pi \tilde{Q}_{\max}(s, a) + \gamma \sum_{s'} p(s'|s, a)c \\
 &= T^\pi \tilde{Q}_{\max}(s, a) + \gamma c.
 \end{aligned}$$

465 Putting everything together, and using the fact that  $T^\nu$  is monotonic and contractive,

$$\begin{aligned}
Q_i^\pi(s, a) &= \lim_{k \rightarrow \infty} (T^\pi)^k \tilde{Q}_{\max}(s, a) \\
&\geq \lim_{k \rightarrow \infty} \left[ \tilde{Q}_{\max}(s, a) - \left( \epsilon(1 + \gamma) - \frac{\gamma(1 - \lambda)r(s, a)}{1 - \lambda\gamma} \right) \sum_{j=0}^k \gamma^j \right] \\
&\geq \tilde{Q}_{\max}(s, a) - \frac{1}{1 - \gamma} \left( \epsilon(1 + \gamma) - \frac{\gamma(1 - \lambda)r(s, a)}{1 - \lambda\gamma} \right) \\
&\geq Q_{\max}(s, a) - \epsilon - \frac{1}{1 - \gamma} \left( \epsilon(1 + \gamma) - \frac{\gamma(1 - \lambda)r(s, a)}{1 - \lambda\gamma} \right) \\
&\geq Q^{\pi_j^*}(s, a) - \frac{1}{1 - \gamma} \left( 2\epsilon + \frac{\gamma(1 - \lambda)r(s, a)}{1 - \lambda\gamma} \right).
\end{aligned}$$

466 This holds for every  $j$ , hence the result.  $\square$

467 **Lemma B.5.** Let  $\nu$  be any policy,  $\lambda, \hat{\lambda} \in [0, 1]$ , and  $Q_\lambda$  denote a value function with  
468 respecting to diminishing rate  $\lambda$ . Then,

$$\|Q_\lambda^\nu - Q_{\hat{\lambda}}^\nu\|_\infty \leq \frac{|\lambda - \hat{\lambda}| \|r\|_\infty}{1 - \gamma}.$$

469 *Proof.* The proof follows from the definition of  $Q$ : for every  $(s, a) \in \mathcal{S} \times \mathcal{A}$ ,

$$\begin{aligned}
|Q_\lambda^\nu(s, a) - Q_{\hat{\lambda}}^\nu(s, a)| &= \left| \mathbb{E}_\pi \left[ \sum_{k=0}^{\infty} \gamma^k \left( \lambda^{n_t(s_{t+k}, k)} - \hat{\lambda}^{n_t(s_{t+k}, k)} \right) r(s_{t+k}) \middle| s_t = s, a_t = a \right] \right| \\
&\leq \mathbb{E}_\pi \left[ \sum_{k=0}^{\infty} \gamma^k \left| \lambda^{n_t(s_{t+k}, k)} - \hat{\lambda}^{n_t(s_{t+k}, k)} \right| r(s_{t+k}) \middle| s_t = s, a_t = a \right] \\
&= \mathbb{E}_\pi \left[ \sum_{k=0}^{\infty} \gamma^k r(s_{t+k}) \left| \lambda - \hat{\lambda} \right| \sum_{j=0}^{n_t(s_{t+k}, k)-1} \lambda^{n_t(s_{t+k}, k)-1-j} \hat{\lambda}^j \middle| s_t = s, a_t = a \right] \\
&\leq |\lambda - \hat{\lambda}| \mathbb{E}_\pi \left[ \sum_{k=0}^{\infty} \gamma^k r(s_{t+k}) \middle| s_t = s, a_t = a \right] \\
&\leq \frac{|\lambda - \hat{\lambda}| \|r\|_\infty}{1 - \gamma}.
\end{aligned}$$

470  $\square$

471 **Theorem 5.1 (GPI).** Let  $\{M_j\}_{j=1}^n \subseteq \mathcal{M}$  and  $M \in \mathcal{M}$  be a set of tasks in an  
472 environment  $\mathcal{M}$  and let  $Q^{\pi_j^*}$  denote the action-value function of an optimal policy of  
473  $M_j$  when executed in  $M$ . Assume that the agent uses diminishing rate  $\hat{\lambda}$  that may  
474 differ from the true environment diminishing rate  $\lambda$ . Given estimates  $\tilde{Q}^{\pi_j}$  such that  
475  $\|Q^{\pi_j^*} - \tilde{Q}^{\pi_j}\|_\infty \leq \epsilon$  for all  $j$ , define

$$\pi(s) \in \operatorname{argmax}_a \max_j \tilde{Q}^{\pi_j}(s, a).$$

476 Then,

$$Q^\pi(s, a) \geq \max_j Q^{\pi_j^*}(s, a) - \frac{1}{1 - \gamma} \left( 2\epsilon + |\lambda - \hat{\lambda}| \|r\|_1 + \frac{\gamma(1 - \lambda)r(s, a)}{1 - \lambda\gamma} \right).$$

477 *Proof.* Let  $Q_\lambda$  denote a value function with respect to diminishing constant  $\lambda$ . We  
 478 wish to bound

$$\max_j Q_{\hat{\lambda}}^{\pi_j^*}(s, a) - Q_\lambda^\pi(s, a),$$

479 i.e., the value of the GPI policy with respect to the true  $\lambda$  compared to the maximum  
 480 value of the constituent policies  $\pi_j^*$  used for GPI, which were used assuming  $\hat{\lambda}$ . By  
 481 the triangle inequality,

$$\begin{aligned} \max_j Q_{\hat{\lambda}}^{\pi_j^*}(s, a) - Q_\lambda^\pi(s, a) &\leq \max_j Q_{\hat{\lambda}}^{\pi_j^*}(s, a) - Q_\lambda^\pi(s, a) + |\max_j Q_{\hat{\lambda}}^{\pi_j^*}(s, a) - \max_j Q_{\hat{\lambda}}^{\pi_j^*}(s, a)| \\ &\leq \underbrace{\max_j Q_{\hat{\lambda}}^{\pi_j^*}(s, a) - Q_\lambda^\pi(s, a)}_{(1)} + \underbrace{\max_j |Q_{\hat{\lambda}}^{\pi_j^*}(s, a) - Q_{\hat{\lambda}}^{\pi_j^*}(s, a)|}_{(2)}. \end{aligned}$$

482 We bound (1) by Lemma B.4 and (2) by Lemma B.5 (noting that  $\|r\|_\infty \leq \|r\|_1$ ) to  
 483 get the result.  $\square$

## 484 B.2 An Extension of Theorem 5.1

485 Inspired by [17], we prove an extension of Theorem 5.1:

486 **Theorem B.1.** *Let  $M \in \mathcal{M}$  be a task in an environment  $\mathcal{M}$  with true diminishing*  
 487 *constant  $\lambda$ . Suppose we perform GPI assuming a diminishing constant  $\hat{\lambda}$ :*

488 *Let  $\{M_j\}_{j=1}^n$  and  $M_i$  be tasks in  $\mathcal{M}$  and let  $Q_i^{\pi_j^*}$  denote the action-*  
 489 *value function of an optimal policy of  $M_j$  when executed in  $M_i$ .*  
 490 *Given estimates  $\tilde{Q}_i^{\pi_j}$  such that  $\|Q_i^{\pi_j^*} - \tilde{Q}_i^{\pi_j}\|_\infty \leq \epsilon$  for all  $j$ , define*  
 491  $\pi(s) \in \arg\max_a \max_j \tilde{Q}_i^{\pi_j}(s, a).$

492 *Let  $Q_\lambda^\pi$  and  $Q_\lambda^{\pi^*}$  denote the action-value functions of  $\pi$  and the  $M$ -optimal policy  $\pi^*$*   
 493 *when executed in  $M$ , respectively. Then,*

$$\|Q_\lambda^{\pi^*} - Q_\lambda^\pi\|_\infty \leq \frac{2}{1-\gamma} \left( \frac{1}{2} |\lambda - \hat{\lambda}| \|r\|_\infty + \epsilon + \|r - r_i\|_\infty + \min_j \|r_i - r_j\|_\infty \right) + \frac{1-\lambda}{1-\lambda\gamma} C,$$

494 *where  $C$  is a positive constant not depending on  $\lambda$ :*

$$C = \gamma \frac{2\|r - r_i\|_\infty + 2 \min_j \|r_i - r_j\|_\infty + \min(\|r\|_\infty, \|r_i\|_\infty) + \min(\|r_i\|_\infty, \|r_1\|_\infty, \dots, \|r_n\|_\infty)}{1-\gamma}.$$

495 Note that when  $\lambda = 1$ , we recover Proposition 1 of [17] with an additional term  
 496 quantifying error incurred by  $\hat{\lambda} \neq \lambda$ . The proof relies on two other technical lemmas,  
 497 presented below.

### Lemma B.6.

$$\|Q^{\pi^*} - Q_i^{\pi_i^*}\|_\infty \leq \frac{\|r - r_i\|_\infty}{1-\gamma} + \gamma(1-\lambda) \frac{\min(\|r\|_\infty, \|r_i\|_\infty) + \|r - r_i\|_\infty}{(1-\gamma)(1-\lambda\gamma)}.$$

498 *Proof.* Define  $\Delta_i := \|Q^{\pi^*} - Q_i^{\pi_i^*}\|_\infty$ . For any  $(s, a) \in \mathcal{S} \times \mathcal{A}$ ,

$$\begin{aligned}
|Q^{\pi^*}(s, a) - Q_i^{\pi_i^*}(s, a)| &= \left| r(s, a) + \gamma \sum_{s'} p(s'|s, a) ((\lambda - 1)r(s, a)\Phi^{\pi^*}(s', \pi^*(s'), s) + Q^{\pi^*}(s', \pi^*(s'))) \right. \\
&\quad \left. - r_i(s, a) - \gamma \sum_{s'} p(s'|s, a) ((\lambda - 1)r_i(s, a)\Phi^{\pi_i^*}(s', \pi_i^*(s'), s) + Q_i^{\pi_i^*}(s', \pi_i^*(s'))) \right| \\
&\leq |r(s, a) - r_i(s, a)| + \gamma \sum_{s'} p(s'|s, a) |Q^{\pi^*}(s, a) - Q_i^{\pi_i^*}(s, a)| \\
&\quad + \gamma(\lambda - 1) \sum_{s'} p(s'|s, a) |r(s, a)\Phi^{\pi^*}(s', \pi^*(s'), s) - r_i(s, a)\Phi^{\pi_i^*}(s', \pi_i^*(s'), s)| \\
&\leq \|r - r_i\|_\infty + \gamma\Delta_i + \gamma(1 - \lambda)\|r\Phi^{\pi^*} - r_i\Phi^{\pi_i^*}\|_\infty.
\end{aligned}$$

499 The third term decomposes as

$$\begin{aligned}
\|r\Phi^{\pi^*} - r_i\Phi^{\pi_i^*}\|_\infty &\leq \|r\Phi^{\pi^*} - r\Phi^{\pi_i^*}\|_\infty + \|r\Phi^{\pi_i^*} - r_i\Phi^{\pi_i^*}\|_\infty \\
&\leq \frac{\|r\|_\infty + \|r - r_i\|_\infty}{1 - \lambda\gamma}.
\end{aligned}$$

500 We could equivalently use the following decomposition:

$$\begin{aligned}
\|r\Phi^{\pi^*} - r_i\Phi^{\pi_i^*}\|_\infty &\leq \|r\Phi^{\pi^*} - r_i\Phi^{\pi^*}\|_\infty + \|r_i\Phi^{\pi^*} - r_i\Phi^{\pi_i^*}\|_\infty \\
&\leq \frac{\|r_i\|_\infty + \|r - r_i\|_\infty}{1 - \lambda\gamma},
\end{aligned}$$

501 and so

$$\|r\Phi^{\pi^*} - r_i\Phi^{\pi_i^*}\|_\infty \leq \frac{\min(\|r\|_\infty, \|r_i\|_\infty) + \|r - r_i\|_\infty}{1 - \lambda\gamma}.$$

502 The inequalities above hold for all  $s, a$  and so

$$\begin{aligned}
\Delta_i &\leq \|r - r_i\|_\infty + \gamma\Delta_i + \gamma(1 - \lambda) \frac{\min(\|r\|_\infty, \|r_i\|_\infty) + \|r - r_i\|_\infty}{1 - \lambda\gamma} \\
\implies \Delta_i &\leq \frac{\|r - r_i\|_\infty}{1 - \gamma} + \gamma(1 - \lambda) \frac{\min(\|r\|_\infty, \|r_i\|_\infty) + \|r - r_i\|_\infty}{(1 - \gamma)(1 - \lambda\gamma)}.
\end{aligned}$$

503 Hence the result. □

504 **Lemma B.7.** For any policy  $\pi$ ,

$$\|Q_i^\pi - Q^\pi\|_\infty \leq \frac{\|r - r_i\|_\infty}{1 - \gamma} + \gamma(1 - \lambda) \frac{\|r - r_i\|_\infty}{(1 - \gamma)(1 - \lambda\gamma)}.$$

505 *Proof.* Write  $\Delta_i := \|Q_i^\pi - Q^\pi\|_\infty$ . Proceeding as in the previous lemma, for all  
 506  $(s, a) \in \mathcal{S} \times \mathcal{A}$ , we have

$$\begin{aligned}
 |Q_i^\pi(s, a) - Q^\pi(s, a)| &= \left| r_i(s, a) + \gamma \sum_{s'} p(s'|s, a) ((\lambda - 1)r_i(s, a)\Phi^\pi(s', \pi(s'), s) + Q_i^\pi(s', \pi(s'))) \right. \\
 &\quad \left. - r(s, a) - \gamma \sum_{s'} p(s'|s, a) ((\lambda - 1)r(s, a)\Phi^\pi(s', \pi(s'), s) + Q^\pi(s', \pi(s'))) \right| \\
 &\leq |r(s, a) - r_i(s, a)| + \gamma \sum_{s'} p(s'|s, a)(1 - \lambda)|r(s, a) - r_i(s, a)|\Phi^\pi(s', \pi(s'), s) \\
 &\quad + \gamma \sum_{s'} p(s'|s, a)|Q_i^\pi(s', \pi(s')) - Q^\pi(s', \pi(s'))| \\
 &\leq \|r - r_i\|_\infty + \gamma(1 - \lambda)\|r - r_i\|_\infty \frac{1}{1 - \lambda\gamma} + \gamma\Delta'_i \\
 \implies \Delta'_i &\leq \|r - r_i\|_\infty + \frac{\gamma(1 - \lambda)\|r - r_i\|_\infty}{1 - \lambda\gamma} + \gamma\Delta'_i \\
 \implies \Delta'_i &\leq \frac{\|r - r_i\|_\infty}{1 - \gamma} + \frac{\gamma(1 - \lambda)\|r - r_i\|_\infty}{(1 - \gamma)(1 - \lambda\gamma)}.
 \end{aligned}$$

507

□

508 Finally, we prove Theorem B.1:

509 *Proof of Theorem B.1.* By the triangle inequality,

$$\|Q_\lambda^{\pi^*} - Q_\lambda^\pi\|_\infty \leq \|Q_\lambda^{\pi^*} - Q_\lambda^\pi\|_\infty + \|Q_\lambda^\pi - Q_\lambda^\pi\|_\infty.$$

510 By Lemma B.5, the second term is bounded above by

$$\frac{|\lambda - \hat{\lambda}|\|r\|_\infty}{1 - \gamma}.$$

511 The first term decomposes as follows (dropping the  $\lambda$  subscript on all action-value  
 512 functions for clarity):

$$\|Q^{\pi^*} - Q^\pi\|_\infty \leq \underbrace{\|Q^{\pi^*} - Q_i^{\pi^*}\|_\infty}_{(1)} + \underbrace{\|Q_i^{\pi^*} - Q_i^\pi\|_\infty}_{(2)} + \underbrace{\|Q_i^\pi - Q^\pi\|_\infty}_{(3)}.$$

513 Applying Lemma B.4 to (2) (but with respect to  $M_i$  rather than  $M$ ), we have that for  
 514 any  $j$ ,

$$\begin{aligned}
 Q_i^{\pi^*}(s, a) - Q_i^\pi(s, a) &\leq Q_i^{\pi^*}(s, a) - Q_i^{\pi_j^*}(s, a) + \frac{1}{1 - \gamma} \left( 2\epsilon + \frac{\gamma(1 - \lambda)r_i(s, a)}{1 - \lambda\gamma} \right) \\
 \implies \|Q_i^{\pi^*} - Q_i^\pi\|_\infty &\leq \underbrace{\|Q_i^{\pi^*} - Q_j^{\pi_j^*}\|_\infty}_{(2.1)} + \underbrace{\|Q_j^{\pi_j^*} - Q_i^{\pi_j^*}\|_\infty}_{(2.2)} + \frac{1}{1 - \gamma} \left( 2\epsilon + \frac{\gamma(1 - \lambda)\|r_i\|_\infty}{1 - \lambda\gamma} \right).
 \end{aligned}$$

515 We bound (2.1) using Lemma B.6 and (2.2) using Lemma B.7 (but with respect to  
 516  $M_j$  rather than  $M$ ):

$$\|Q_i^{\pi^*} - Q_j^{\pi_j^*}\|_\infty + \|Q_j^{\pi_j^*} - Q_i^{\pi_j^*}\|_\infty \leq \frac{2\|r_i - r_j\|_\infty}{1 - \gamma} + \gamma(1 - \lambda) \frac{\min(\|r_i\|_\infty, \|r_j\|_\infty) + 2\|r_i - r_j\|_\infty}{(1 - \gamma)(1 - \lambda\gamma)}.$$

We then apply Lemma B.6 to (1) and Lemma B.7 to (3) to get the result.

□



## C An $n$ th Occupancy Representation

To generalize the first occupancy representation to account for reward functions of this type, it's natural to consider an  $N$ th occupancy representation—that is, one which accumulates value only for the first  $N$  occupancies of one state  $s'$  starting from another state  $s$ :

**Definition C.1 (NR).** For an MDP with finite  $\mathcal{S}$ , the  $N$ th-occupancy representation (NR) for a policy  $\pi$  is given by  $F^\pi \in [0, N]^{|\mathcal{S}| \times |\mathcal{S}|}$  such that

$$\Phi_{(N)}^\pi(s, s') \triangleq \mathbb{E}_\pi \left[ \sum_{k=0}^{\infty} \gamma^{t+k} \mathbb{1}(s_{t+k} = s', \#(\{j \mid s_{t+j} = s', j \in [0, k-1]\}) < N) \mid s_t \right]. \quad (\text{C.1})$$

Intuitively, such a representation sums the first  $N$  (discounted) occupancies of  $s'$  from time  $t$  to  $t+k$  starting from  $s_t = s$ . We can also note that  $\Phi_{(1)}^\pi$  is simply the FR and  $\Phi_{(0)}(s, s') = 0 \forall s, s'$ . As with the FR and the SR, we can derive a recursive relationship for the NR:

$$\Phi_{(N)}^\pi(s, s') = \mathbb{1}(s_t = s')(1 + \gamma \mathbb{E} \Phi_{(N-1)}^\pi(s_{t+1}, s')) + \gamma(1 - \mathbb{1}(s_t = s')) \mathbb{E} \Phi_{(N)}^\pi(s_{t+1}, s'), \quad (\text{C.2})$$

where the expectation is wrt  $p^\pi(s_{t+1} | s_t)$ . Once again, we can confirm that this is consistent with the FR by noting that for  $N = 1$ , the NR recursion recovers the FR recursion. Crucially, we also recover the SR recursion in the limit as  $N \rightarrow \infty$ :

$$\begin{aligned} \lim_{N \rightarrow \infty} \Phi_{(N)}^\pi(s, s') &= \mathbb{1}(s_t = s')(1 + \gamma \mathbb{E} \Phi_{(\infty)}^\pi(s_{t+1}, s')) + \gamma(1 - \mathbb{1}(s_t = s')) \mathbb{E} \Phi_{(\infty)}^\pi(s_{t+1}, s') \\ &= \mathbb{1}(s_t = s') + \gamma \mathbb{E} \Phi_{(\infty)}^\pi(s_{t+1}, s'). \end{aligned}$$

This is consistent with the intuition that the SR accumulates every (discounted) state occupancy in a potentially infinite time horizon of experience. While Definition C.1 admits a recursive form which is consistent with our intuition, Eq. (C.2) reveals an inconvenient intractability: the Bellman target for  $\Phi_{(N)}^\pi$  requires the availability of  $\Phi_{(N-1)}^\pi$ . This is a challenge, because it means that if we'd like to learn any NR for finite  $N > 1$ , the agent also must learn and store  $\Phi_{(1)}^\pi, \dots, \Phi_{(N-1)}^\pi$ . Given these challenges, the question of how to learn a tractable general occupancy representation remains. From a neuroscientific perspective, a fixed depletion amount is also inconsistent with both behavioral observations and neural imaging [3], which indicate instead that utility disappears at a fixed rate in proportion to the *current remaining utility*, rather than in proportion to the *original utility*. We address these theoretical and practical issues in the next section.

## D Further Experimental Details

### D.1 Policy Evaluation

We perform policy evaluation for the policy shown in Fig. 4.1 on the  $6 \times 6$  gridworld shown. The discount factor  $\gamma$  was set to 0.9 for all experiments, which were run for

547  $H = 10$  steps per episode. The error metric was the mean squared error:

$$Q_{error} \triangleq \frac{1}{|\mathcal{S}||\mathcal{A}|} \sum_{s,a} (Q^\pi(s,a) - \hat{Q}(s,a))^2, \quad (\text{D.1})$$

548 where  $Q^\pi$  is the ground truth  $Q$ -values and  $\hat{Q}$  is the estimate. Transitions are  
 549 deterministic. For the dynamic programming result, we learned the  $\lambda$ R using  
 550 Eq. (4.3) for  $\lambda \in \{0.5, 1.0\}$  and then measured the resulting values by multiplying  
 551 the resulting  $\lambda$ R by the associated reward vector  $\mathbf{r} \in \{-1, 0, 1\}^{36}$ , which was  $-1$  in  
 552 all wall states and  $+1$  at the reward state  $g$ . We compared the results to the ground  
 553 truth values. Dynamic programming was run until the maximum Bellman error  
 554 across state-action pairs reduced below  $5\text{e-}2$ . For the tabular TD learning result, we  
 555 ran the policy for three episodes starting from every available (non-wall) state in the  
 556 environment, and learned the  $\lambda$ R for  $\lambda \in \{0.5, 1.0\}$  as above, but using the online  
 557 TD update:

$$\begin{aligned} \Phi_\lambda(s_t, a_t) &\leftarrow \Phi_\lambda(s_t, a_t) + \alpha \delta_t, \\ \delta_t &= \mathbf{1}(s_t) \odot (1 + \gamma \lambda \Phi_\lambda(s_{t+1}, a_{t+1})) + \gamma(1 - \mathbf{1}(s_t)) \odot \Phi_\lambda(s_{t+1}, a_{t+1}) - \Phi_\lambda(s_t, a_t), \end{aligned}$$

558 where  $a_{t+1} \sim \pi(\cdot | s_{t+1})$ . The learned  $Q$ -values were then computed in the same  
 559 way as the dynamic programming case and compared to the ground truth. For the  
 560  $\lambda$ F result, we first learned Laplacian eigenfunction base features as described in  
 561 [24] from a uniform exploration policy and normalized them to the range  $[0, 1]$ . We  
 562 parameterized the base feature network as a 2-layer MLP with ReLU activations  
 563 and 16 units in the hidden layer. We then used the base features to learn the  $\lambda$ Fs  
 564 as in the tabular case, but with the  $\lambda$ F network parameterized as a three-layer MLP  
 565 with 16 units in each of the hidden layers and ReLU activations. All networks were  
 566 optimized using Adam with a learning rate of  $3\text{e-}4$ . The tabular and neural network  
 567 experiments were repeated for three random seeds, the former was run for 1,500  
 568 episodes and the latter for 2,000.

## 569 D.2 Policy Learning

570 We ran the experiments for Fig. 5.2 in a version of the TwoRooms environment  
 571 from the NeuroNav benchmark [21] with reward modified to decay with a specified  
 572  $\lambda_{true} = 0.5$  and discount factor  $\gamma = 0.95$ . The initial rewards in the top right  
 573 goal and the lower room goal locations were 5 and the top left goal had initial  
 574 reward 10. The observations in the neural network experiment were one-hot state  
 575 indicators. The tabular  $Q_\lambda$  experiments run the algorithm in Algorithm 1 for 500  
 576 episodes for  $\lambda \in \{0.0, 0.5, 1.0\}$ , with  $\lambda_{true}$  set to 0.5, repeated for three random  
 577 seeds. Experiments used a constant step size  $\alpha = 0.1$ . There were five possible  
 578 actions: up, right, down, left, and stay. The recurrent A2C agents were based on  
 579 the implementation from the BSuite library [30] and were run for 7,500 episodes of  
 580 maximum length  $H = 100$  with  $\gamma = 0.99$  using the Adam optimizer with learning  
 581 rate  $3\text{e-}4$ . The experiment was repeated for three random seeds. The RNN was an  
 582 LSTM with 128 hidden units and three output heads: one for the policy, one for the  
 583 value function, and one for the  $\lambda$ F. The base features were one-hot representations  
 584 of the current state, 121-dimensional in this case.

---

Algorithm 1: Online Tabular  $Q_\lambda$ -Learning Update

---

- 1: **Require:** Current  $\lambda$ R-values  $\Phi_\lambda^{(t)} \in \mathbb{R}^{|S| \times |A| \times |S|}$ , current reward vector  $\mathbf{r}^{(t)}$ , observed  $(s_t, a_t, s_{t+1})$  tuple
  - 2: Compute  $Q_\lambda$ -values:  $Q_\lambda^{(t)} \leftarrow (\Phi_\lambda^{(t)})^\top \mathbf{r}^{(t)}$
  - 3: Select greedy action:  $a_{t+1} \leftarrow \operatorname{argmax}_{a \in \mathcal{A}} Q_\lambda^{(t)}(s_{t+1}, a)$
  - 4: Update  $\Phi_\lambda$ :
 
$$\Phi_\lambda^{(t+1)}(s_t, a_t) \leftarrow \Phi_\lambda^{(t)}(s_t, a_t) + \alpha \delta^{(t)}, \quad \text{where}$$

$$\delta^{(t)} = \mathbf{1}(s_t) \odot (1 + \gamma \lambda \Phi_\lambda^{(t)}(s_{t+1}, a_{t+1})) + \gamma(1 - \mathbf{1}(s_t)) \odot \Phi_\lambda^{(t)}(s_{t+1}, a_{t+1}) - \Phi_\lambda^{(t)}(s_t, a_t).$$
  - 5: **Return** updated  $\Phi_\lambda^{(t+1)}$
- 

### D.3 Tabular GPI

The agent is assumed to be given or have previously acquired four policies  $\{\pi_0, \pi_1, \pi_2, \pi_3\}$  individually optimized to reach rewards located in each of the four rooms of the environment. There are three reward locations  $\{g_0, g_1, g_2\}$  scattered across the rooms, each with its own initial reward  $\bar{r} = [5, 10, 5]$  and all with  $\lambda = 0.5$ . At the beginning of each episode, an initial state  $s_0$  is sampled uniformly from the set of available states. An episode terminates either when the maximum reward remaining in any of the goal states is less than 0.1 or when the maximum number of steps  $H = 40$  is reached. Empty states carry a reward of 0, encountering a wall gives a reward of  $-1$ , and the discount factor is set to  $\gamma = 0.97$ .

For each of the four policies, we learn  $\lambda$ Rs with  $\lambda$  equal to 0, 0.5, and 1.0 using standard dynamic programming (Bellman error curves plotted in ??), and record the returns obtained while performing GPE+GPI with each of these representations over the course of 50 episodes. Bellman error curves for the  $\lambda$ Rs are In the left panel of Fig. 5.3, we can indeed see that using the correct  $\lambda$  (0.5) nets the highest returns. Example trajectories for each of  $\lambda$ R are shown in the remaining panels.

### D.4 Pixel-Based GPI

In this case, the base policies  $\Pi$  were identical to those used in the tabular GPI experiments. First, we collected a dataset consisting of 340 observation trajectories  $(o_0, o_1, \dots, o_{H-1}) \in \mathcal{O}^H$  with  $H = 19$  from each policy, totalling 6,460 observations. Raw observations were  $128 \times 128 \times 3$  and were converted to grayscale. The previous seven observations were stacked and used to train a Laplacian eigenfunction base feature network in the same way as [24]. For observations less than seven steps from the start of an episode, the remaining frames were filled in as all black observations (i.e., zeros). The network consisted of four convolutional layers with  $32 \ 3 \times 3$  filters with strides  $(2, 2, 2, 1)$ , each followed by a ReLU nonlinearity. This was then flattened and passed through a Layer Norm layer [31] and a tanh nonlinearity before three fully fully connected layers, the first two with 64 units each and ReLU nonlinearities and the final, output layer with 50 units. The output was  $L_2$ -normalized as in [24]. This network  $\phi : \mathcal{O}^7 \mapsto \mathbb{R}^D$  (with  $D = 50$ ) was trained on the stacked observations for 10 epochs using the Adam optimizer and learning rate

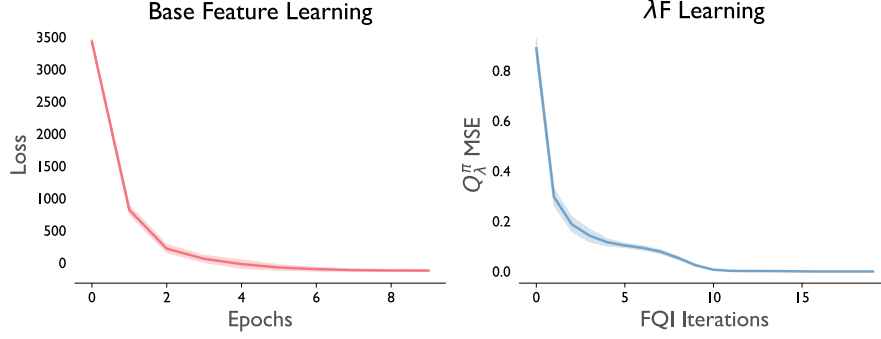

Figure D.1: **Learning curves for  $\lambda$ F policy evaluation.** Results are averaged over three runs, with shading indicating one unit of standard error.

1e-4 with batch size  $B = 64$ . To perform policy evaluation, the resulting features, evaluated on the dataset of stacked observations were collected into their own dataset of  $(s_t, a_{t+1}, s_{t+1}, a_{t+1})$  tuples, where  $s_t \triangleq o_{t-6:t}$ . The “states” were normalized to be between 0 and 1, and a vector  $\mathbf{w}$  was fit to the actual associated rewards via linear regression on the complete dataset. The  $\lambda$ F network was then trained using a form of neural fitted Q-iteration [FQI; 32] modified for policy evaluation with  $\lambda$ Fs (Algorithm 2). The architecture for the  $\lambda$ F network was identical to the base feature network, with the exception that the hidden size of the fully connected layers was 128 and the output dimension was  $D|\mathcal{A}| = 250$ . FQI was run for  $K = 20$  outer loop iterations, with each inner loop supervised learning setting run for  $L = 100$  epochs on the current dataset. Supervised learning was done using Adam with learning rate  $3\text{e-}4$  and batch size  $B = 64$ . Given the trained networks, GPI proceeded as in the tabular case, i.e.,

$$a_t = \operatorname{argmax}_{a \in \mathcal{A}} \max_{\pi \in \Pi} \mathbf{w}^\top \varphi_\theta^\pi(s_t, a). \quad (\text{D.2})$$

50 episodes were run from random starting locations for  $H = 50$  steps and the returns measured. Learning curves for the base features and for  $\lambda$ F fitting are shown in Fig. D.1. The  $\lambda$ F curve measures the mean squared error as in Eq. (D.1).

The feature visualizations were created by performing PCA to reduce the average  $\lambda$ F representations for observations at each state in the environment to 2D. Each point in the scatter plot represents the reduced representation on the  $xy$  plane, and is colored according to the  $\lambda$ -conditioned value of the underlying state.

## D.5 Continuous Control

$\lambda$ -SAC See Appendix H for details.

## D.6 Learning the $\lambda$ O with FB

Training the  $\lambda$ O with the FB parameterization proceeds in much the same way as in [12], but adjusted for a different norm and non-Markovian environment. We summarize the learning procedure in Algorithm 3. The loss function  $\mathcal{L}$  is derived in Appendix G, with the addition of the following regularizer:

$$\|\mathbb{E}_{s \sim \rho} B_\omega(s) B_\omega(s)^\top - I\|^2.$$

---

Algorithm 2: Fitted  $Q_\lambda$ -Iteration

---

```

1: Require: Dataset of base features  $\{\phi(s) \in \mathbb{R}^D\}_{s \in \mathcal{S}}$ , decay rate  $\lambda$ , discount factor  $\gamma$ , reward
   feature vector  $\mathbf{w} \in \mathbb{R}^D$ , batch size  $B$ , learning rate  $\alpha$ 
2: Initialize  $\lambda$ F  $\varphi_\theta$  parameters  $\theta^{(1)}$  (we drop the subscript  $\lambda$  and superscript  $\pi$  for concision)
3: for  $k = 1 \dots K$  do
4:   // Stage 1: Construct dataset
5:    $\mathcal{D} \leftarrow \emptyset$ 
6:   for  $(s, a) \in \mathcal{S} \times \mathcal{A}$  do
7:     for  $(s', a') \in \mathcal{S} \times \mathcal{A}$  do
8:        $\mathcal{D} \leftarrow \mathcal{D} \cup \left\{ \left( (s, a), \underbrace{\mathbf{w}^\top [\phi(s) \odot (1 + \lambda\gamma\bar{\varphi}_{\theta^{(k)}}(s', a')) + \gamma(1 - \phi(s)) \odot \bar{\varphi}_{\theta^{(k)}}(s', a')]}_{\triangleq y(s, a)} \right) \right\}$ 
9:     end for
10:   end for
11:   // Stage 2: Supervised learning
12:   Randomly initialize  $\theta_0$ 
13:   for  $\ell = 1, \dots, L$  do
14:     Randomly shuffle  $\mathcal{D}$ 
15:     for  $\{(s, a), y\}_{b=1}^B \in \mathcal{D}$  do
16:        $\theta_\ell \leftarrow \theta_{\ell-1} - \alpha \nabla_{\theta} \frac{1}{2B} \sum_{b=1}^B (y_b - \mathbf{w}^\top \varphi_{\theta_{\ell-1}}(s_b, a_b))^2$ 
17:     end for
18:   end for
19:    $\theta^{(k+1)} \leftarrow \theta_L$ 
20: end for

```

---

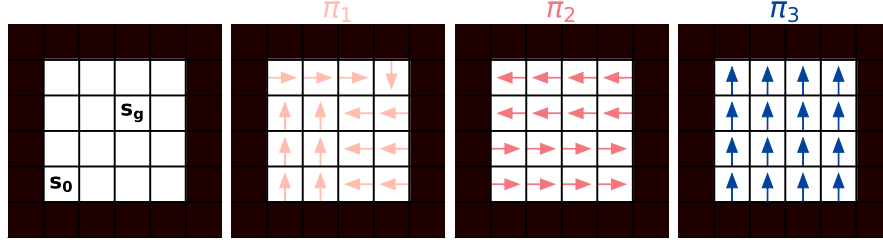

Figure E.1: A simple grid and several policies.

643 This regularizer encourages  $B$  to be approximately orthonormal, which promotes  
 644 identifiability of  $F_\theta$  and  $B_\omega$  [12].

## 645 E Additional Results

646 See surrounding sections.

## 647 F Advantage of the Correct $\lambda$

648 Importantly, for GPE using the  $\lambda$ R to work in this setting, the agent must either  
 649 learn or be provided with the updated reward vector  $\mathbf{r}_\lambda$  after each step/encounter  
 650 with a rewarded state. This is because the  $\lambda$ R is forward-looking in that it measures  
 651 the (diminished) expected occupancies of states in the future without an explicit  
 652 mechanism for remembering previous visits. For simplicity in this case, we provide  
 653 this vector to the agent at each step—though if we view such a multitask agent as

---

Algorithm 3:  $\lambda$ O FB Learning

---

1: **Require:** Probability distribution  $\nu$  over  $\mathbb{R}^d$ , randomly initialized networks  $F_\theta, B_\omega$ , learning rate  $\eta$ , mini-batch size  $B$ , number of episodes  $E$ , number of epochs  $M$ , number of time steps per episode  $T$ , number of gradient steps  $N$ , regularization coefficient  $\beta$ , Polyak coefficient  $\alpha$ , initial diminishing constant  $\lambda$ , discount factor  $\gamma$ , exploratory policy greediness  $\epsilon$ , temperature  $\tau$

2: // Stage 1: Unsupervised learning phase

3:  $\mathcal{D} \leftarrow \emptyset$

4: **for** epoch  $m = 1, \dots, M$  **do**

5:   **for** episode  $i = 1 \dots, E$  **do**

6:     Sample  $z \sim \nu$

7:     Observe initial state  $s_1$

8:     **for**  $t = 1, \dots, T$  **do**

9:       Select  $a_t \leftarrow \text{greedy}$  with respect to  $F_\theta(s_t, a, z)^\top z$

10:       Observe reward  $r_t(s_t)$  and next state  $s_{t+1}$

11:        $\mathcal{D} \leftarrow \mathcal{D} \cup \{(s_t, a_t, r_t(s_t), s_{t+1})\}$

12:     **end for**

13:   **end for**

14:   **for**  $n = 1, \dots, N$  **do**

15:     Sample a minibatch  $\{(s_j, a_j, r_j(s_j), s_{j+1})\}_{j \in J} \subset \mathcal{D}$  of size  $|J| = B$

16:     Sample a minibatch  $\{\tilde{s}_j\}_{j \in J} \subset \mathcal{D}$  of size  $|J| = B$

17:     Sample a minibatch  $\{s'_j\}_{j \in J} \stackrel{\text{iid}}{\sim} \mu$  of size  $|J| = B$

18:     Sample a minibatch  $\{z_j\}_{j \in J} \stackrel{\text{iid}}{\sim} \nu$  of size  $|J| = B$

19:     For every  $j \in J$ , set  $\pi_{z_j}(\cdot | s_{j+1}) = \text{softmax}(F_{\theta^-}(s_{j+1}, \cdot, z_j)^\top z_j / \tau)$

20:

$$\begin{aligned} \mathcal{L}(\theta, \omega) \leftarrow & \frac{1}{2B^2} \sum_{j, k \in J^2} \left( F_\theta(s_j, a_j, z_j)^\top B_\omega(s'_k) - \gamma \sum_{a \in \mathcal{A}} \pi_{z_j}(a | s_{j+1}) F_{\theta^-}(s_{j+1}, a, z_j)^\top B_{\omega^-}(s'_k) \right)^2 \\ & - \frac{1}{B} \sum_{j \in J} F_\theta(s_j, a_j, z_j)^\top B_\omega(s_j) \\ & + \frac{\gamma(1-\lambda)}{B} \sum_{j \in J} \mu(s_j) F_\theta(s_j, a_j, z_j)^\top B_\omega(s_j) \sum_{a \in \mathcal{A}} \pi_{z_j}(a | s_{j+1}) F_{\theta^-}(s_{j+1}, a, z_j)^\top B_{\omega^-}(s_j) \\ & + \beta \left( \frac{1}{B^2} \sum_{j, k \in J^2} B_\omega(s_j)^\top \bar{B}_\omega(\tilde{s}_k) \bar{B}_\omega(s_j)^\top \bar{B}_\omega(\tilde{s}_k) - \frac{1}{B} \sum_{j \in J} B_\omega(s_j)^\top \bar{B}_\omega(s_j) \right) \end{aligned}$$

21:   Update  $\theta$  and  $\omega$  via one step of Adam on  $\mathcal{L}$

22:   Sample a minibatch  $\{(s_j, r_j(s_j), s_{j+1}, r_{j+1}(s_{j+1}))\}_{j \in J}$  of size  $|J| = B$  from  $\mathcal{D}$

23:    $\mathcal{L}_\lambda(\lambda) \leftarrow \frac{1}{2B} \sum_{j \in J} \mathbb{1}(s_{j+1} = s_j) (r_{j+1}(s_{j+1}) - \lambda r_j(s_j))^2$

24:   Update  $\lambda$  via one step of Adam on  $\mathcal{L}_\lambda$

25:   **end for**

26:    $\theta^- \leftarrow \alpha \theta^- + (1 - \alpha) \theta$

27:    $\omega^- \leftarrow \alpha \omega^- + (1 - \alpha) \omega$

28: **end for**

29: // Stage 2: Exploitation phase for a single episode with initial reward  $r_0(s)$

30:  $z_R \leftarrow \sum_{s \in \mathcal{S}} \mu(s) r_0(s) B_\omega(s)$

31: Observe initial state  $s_1$

32: **for**  $t = 1, \dots, T$  **do**

33:    $a_t \leftarrow \text{argmax}_{a \in \mathcal{A}} F(s_t, a, z_R)^\top z_R$

34:   Observe reward  $r_t(s)$  and next state  $s_{t+1}$

35:    $z_R \leftarrow \sum_{s \in \mathcal{S}} \mu(s) r_t(s) B_\omega(s)$

36: **end for**

---

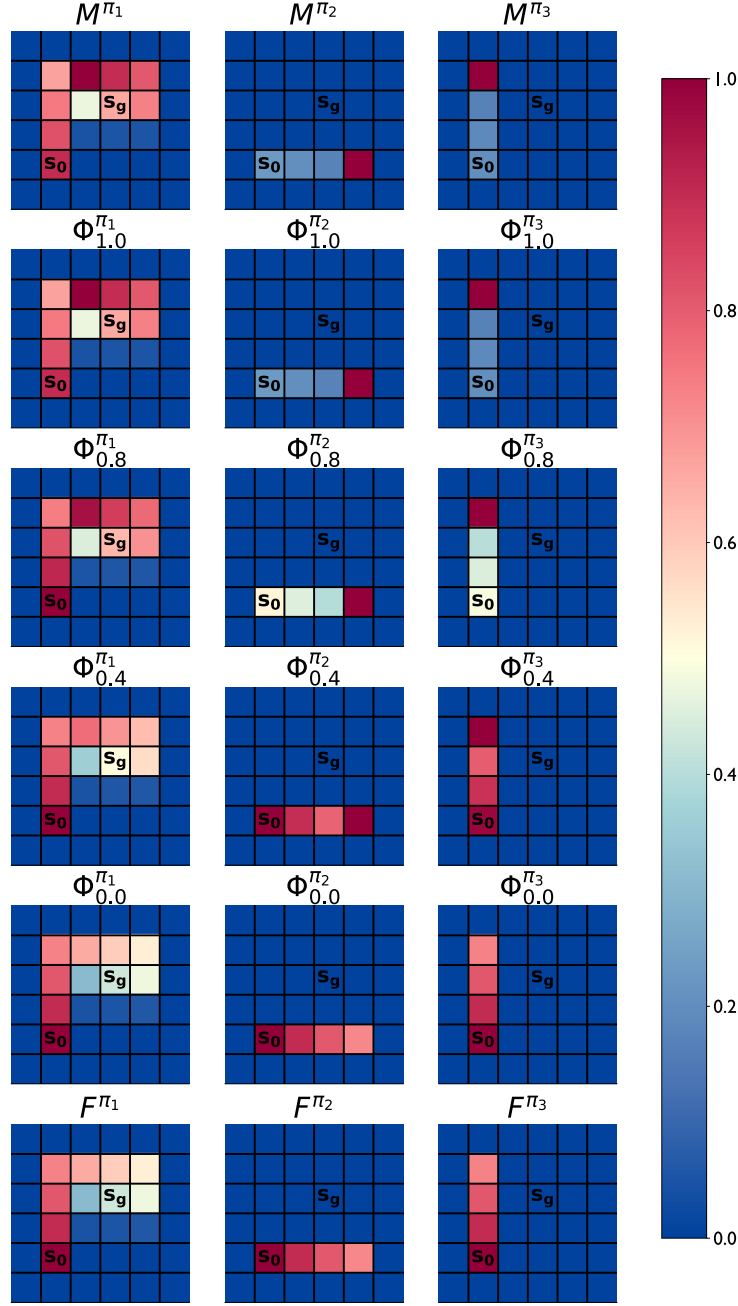

Figure E.2: **Visualizing the SR, the  $\lambda$ R and the FR.** We can see that the  $\Phi_1^\pi$  is equivalent to the SR and  $\Phi_0^\pi$  is equivalent to the FR, with intermediate values of  $\lambda$  providing a smooth transition between the two.

654 simply as a module carrying out the directives of a higher-level module or policy  
655 within a hierarchical framework as in, e.g., Feudal RL [33], the explicit provision of  
656 reward information is not unrealistic. Regardless, a natural question in this case is  
657 whether there is actually any value in using the  $\lambda$ R with the correct value of  $\lambda$  in this  
658 setting: If the agent is provided with the correct reward vector, then wouldn't policy  
659 evaluation work with any  $\lambda$ R?

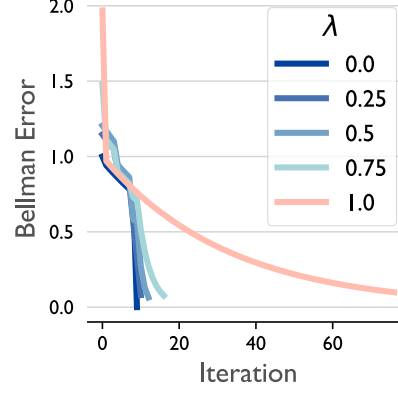

Figure E.3: Dynamic programming converges more quickly for lower  $\lambda$ .

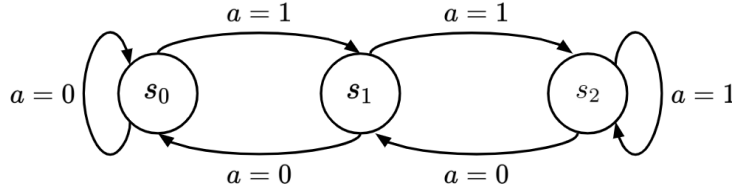

Figure F.1: A 3-state toy environment.

To see that this is not the case, consider the three-state toy MDP shown in Figure Fig. F.1, where  $\bar{r}(s_1) = 10$ ,  $\bar{r}(s_2) = 6$ ,  $\bar{r}(s_0) = 0$ ,  $\lambda(s_1) = 0$ ,  $\lambda(s_2) = 1.0$ , and  $\gamma = 0.99$ . At time  $t = 0$ , the agent starts in  $s_0$ . Performing policy evaluation with  $\lambda(s_1) = \lambda(s_2) = 1$  (i.e., with the SR) would lead the agent to go left to  $s_1$ . However, the reward would then disappear, and policy evaluation on the second step would lead it to then move right to  $s_0$  and then  $s_2$ , where it would stay for the remainder of the episode. In contrast, performing PI with the correct values of  $\lambda$  would lead the agent to go right to  $s_2$  and stay there. In the first two timesteps, the first policy nets a total reward of  $10 + 0 = 10$ , while the second policy nets  $6 + 5.94 = 11.94$ . (The remaining decisions are identical between the two policies.) This is a clear example of the benefit of having the correct  $\lambda$ , as incorrect value estimation leads to suboptimal decisions even when the correct reward vector/function is provided at each step.

## G The $\lambda$ Operator

To learn the  $\lambda$ O, we would like to define  $\Phi_\lambda^\pi(s_t, ds') \triangleq \varphi_\lambda^\pi(s_t, s')\mu(ds')$  for some base policy  $\mu$ . However, this would lead to a contradiction:

$$\Phi_\lambda^\pi(s, A \cup B) = \int_A \varphi_\lambda^\pi(s, ds')\mu(ds') + \int_B \varphi_\lambda^\pi(s, ds')\mu(ds') = \Phi_\lambda^\pi(s, A) + \Phi_\lambda^\pi(s, B)$$

for all disjoint  $A, B$ , contradicting Lemma B.3.

For now, we describe how to learn the  $\lambda$ O for discrete  $\mathcal{S}$ , in which case we have  $\Phi_\lambda^\pi(s, s') = \varphi_\lambda^\pi(s, s')\mu(s')$ , i.e., by learning  $\varphi$  we learn a weighted version of  $\Phi$ . We



679 define the following norm, inspired by Touati et al. [24]:

$$\|\Phi_\lambda^\pi\|_\rho^2 \triangleq \mathbb{E}_{\substack{s \sim \rho \\ s' \sim \mu}} \left[ \left( \frac{\Phi_\lambda^\pi(s, s')}{\mu(s')} \right)^2 \right],$$

680 where  $\mu$  is any density on  $\mathcal{S}$ . In the case of finite  $\mathcal{S}$ , we let  $\mu$  be the uniform density.  
 681 We then minimize the Bellman error for  $\Phi_\lambda^\pi$  with respect to  $\|\cdot\|_{\rho, \mu}^2$  (dropping the  
 682 sub/superscripts on  $\Phi$  and  $\varphi$  for clarity):

$$\begin{aligned} \mathcal{L}(\Phi) &= \|\varphi\mu - (I \odot (\mathbf{1}\mathbf{1}^\top + \lambda\gamma P^\pi \varphi\mu) + \gamma(\mathbf{1}\mathbf{1}^\top + I) \odot P^\pi \varphi\mu)\|_{\rho, \mu}^2 \\ &= \mathbb{E}_{s_t \sim \rho, s' \sim \mu} \left[ \left( \varphi(s_t, s') - \frac{\mathbb{1}(s_t = s')}{\mu(s')} \right. \right. \\ &\quad \left. \left. + \gamma(1 - \lambda) \frac{\mathbb{1}(s_t = s')}{\mu(s')} \mathbb{E}_{s_{t+1} \sim p^\pi(\cdot|s_t)} \bar{\Phi}(s_{t+1}, s') - \gamma \mathbb{E}_{s_{t+1} \sim p^\pi(\cdot|s_t)} \bar{\varphi}(s_{t+1}, s') \right)^2 \right] \\ &\stackrel{+c}{=} \mathbb{E}_{s_t, s_{t+1} \sim \rho, s' \sim \mu} \left[ (\varphi(s_t, s') - \gamma \bar{\varphi}(s_{t+1}, s'))^2 \right] \\ &\quad - 2 \mathbb{E}_{s_t, s_{t+1} \sim \rho} \left[ \sum_{s'} \mu(s') \varphi(s_t, s') \frac{\mathbb{1}(s_t = s')}{\mu(s')} \right] \\ &\quad + 2\gamma(1 - \lambda) \mathbb{E}_{s_t, s_{t+1} \sim \rho} \left[ \sum_{s'} \mu(s') \varphi(s_t, s') \bar{\varphi}(s_{t+1}, s') \mu(s') \frac{\mathbb{1}(s_t = s')}{\mu(s')} \right] \\ &\stackrel{+c}{=} \mathbb{E}_{s_t, s_{t+1} \sim \rho, s' \sim \mu} \left[ (\varphi(s_t, s') - \gamma \bar{\varphi}(s_{t+1}, s'))^2 \right] - 2 \mathbb{E}_{s_t \sim \rho} [\varphi(s_t, s_t)] \\ &\quad + 2\gamma(1 - \lambda) \mathbb{E}_{s_t, s_{t+1} \sim \rho} [\mu(s_t) \varphi(s_t, s_t) \bar{\varphi}(s_{t+1}, s_t)], \end{aligned}$$

683 Note that we recover the SM loss when  $\lambda = 1$ . Also, an interesting interpretation is  
 684 that when the agent can never return to its previous state (i.e.,  $\varphi(s_{t+1}, s_t) = 0$ ), then  
 685 we also recover the SM loss, regardless of  $\lambda$ . In this way, the above loss appears to  
 686 “correct” for repeated state visits so that the measure only reflects the first visit.

$$\begin{aligned} \mathcal{L}(\Phi) &= \mathbb{E}_{s_t, a_t, s_{t+1} \sim \rho, s' \sim \mu} \left[ (F(s_t, a_t, z)^\top B(s') - \gamma \bar{F}(s_{t+1}, \pi_z(s_{t+1}), z)^\top \bar{B}(s'))^2 \right] \\ &\quad - 2 \mathbb{E}_{s_t, a_t \sim \rho} [F(s_t, a_t, z)^\top B(s_t)] \\ &\quad + 2\gamma(1 - \lambda) \mathbb{E}_{s_t, a_t, s_{t+1} \sim \rho} [\mu(s_t) F(s_t, a_t, z)^\top B(s_t) \bar{F}(s_{t+1}, \pi_z(s_{t+1}), z)^\top \bar{B}(s_t)] \end{aligned} \tag{G.1}$$

687 Even though the  $\lambda\text{O}$  is not a measure, we can use the above loss to the continuous  
 688 case, pretending as though we could take the Radon-Nikodym derivative  $\frac{\Phi(s, ds')}{\mu(ds')}$ .

### 689 G.1 Experimental Results with the FB Parameterization

690 To show that knowing the correct value of  $\lambda$  leads to improved performance, we  
 691 trained  $\lambda\text{O}$  with the FB parameterization on the FourRooms task of Fig. 5.3, but  
 692 with each episode initialized at a random start state and with two random goal  
 693 states. Average per-epoch reward is shown in Fig. G.2. We tested performance

| Hyperparameter | Value |
|----------------|-------|
| $M$            | 100   |
| $E$            | 100   |
| $N$            | 25    |
| $B$            | 128   |
| $T$            | 50    |
| $\gamma$       | 0.99  |
| $\alpha$       | 0.95  |
| $\eta$         | 0.001 |
| $\tau$         | 200   |
| $\epsilon$     | 1     |

Table 1:  $\lambda$ O-FB hyperparameters.

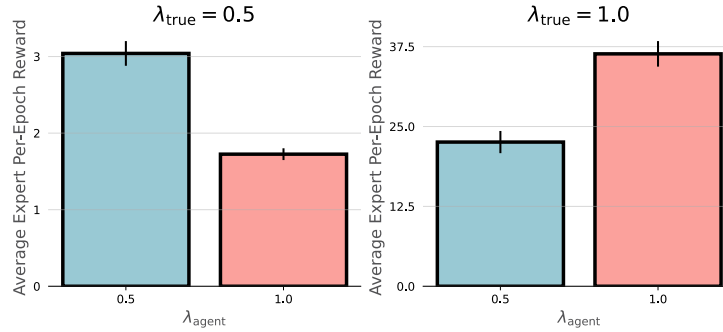

Figure G.1: **Performance of the  $\lambda$ O-FB with two values of  $\lambda$ .** Results averaged over six seeds and 10 episodes per seed. Error bars indicate standard error.

with  $\lambda_{\text{true}}, \lambda_{\text{agent}} \in \{0.5, 1.0\}$ , where  $\lambda_{\text{true}}$  denotes the true environment diminishing rate and  $\lambda_{\text{agent}}$  denotes the diminishing rate that the agent uses. For the purpose of illustration, we do not allow the agent to learn  $\lambda$ . We see in Fig. G.2 that using the correct  $\lambda$  leads to significantly increased performance. In particular, the left plot shows that assuming  $\lambda = 1$ , i.e., using the SR, in a diminishing environment can lead to highly suboptimal performance.

Hyperparameters used are given in Table 1 (notation as in Algorithm 3).

## G.2 $\lambda$ O and the Marginal Value Theorem

To study whether the agent’s behavior is similar to behavior predicted by the MVT, we use a very simple task with constant starting state and vary the distance between rewards (see Fig. G.1(a)). When an agent is in a reward state, we define an MVT-optimal leaving time as follows (similar to that of [8] but accounting for the non-stationarity of the reward).

Let  $R$  denote the average per-episode reward received by a trained agent,  $r(s_t)$  denote the reward received at time  $t$  in a given episode,  $R_t = \sum_{u=0}^t r(s_u)$  denote the total reward received until time  $t$  in the episode, and let  $T$  be episode length. Then, on average, the agent should leave its current reward state at time  $t$  if the next reward that it would receive by staying in  $s_t$ , i.e.,  $\lambda r(s_t)$ , is less than

$$\frac{R - R_t}{T}.$$

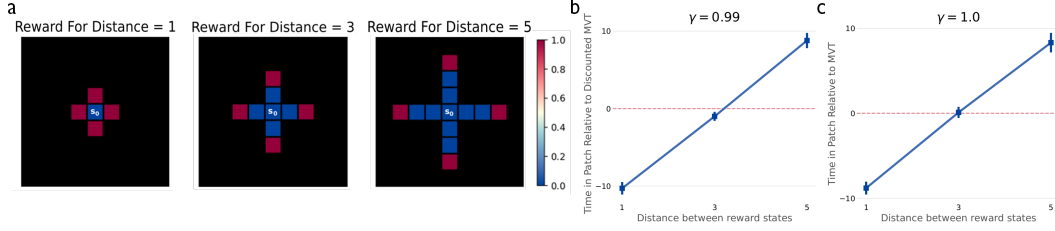

Figure G.2: **Analysis of MVT-like behavior of  $\lambda$ O-FB.** **a)** Three environments with equal start state and structure but different distances between reward states. **b)** Difference between the agent’s leave times and MVT-predicted leave times for  $\gamma = 0.99$ , with discounting taken into account. The agent on average behaves similar to the discounted MVT. **c)** Difference between the agent’s leave times and MVT-predicted leave times for  $\gamma = 1.0$ , i.e., with no discounting taken into account. The agent on average behaves similar to the MVT.

712 In other words, the agent should leave a reward state when its incoming reward falls  
713 below the diminished average per-step reward of the environment. We compute  $R$   
714 by averaging reward received by a trained agent over many episodes.

715 Previous studies have trained agents that assume stationary reward to perform  
716 foraging tasks, even though the reward in these tasks is non-stationary. These agents  
717 can still achieve good performance and MVT-like behavior [8]. However, because  
718 they target the standard RL objective

$$\mathbb{E}_{\pi} \left[ \sum_{k=0}^{\infty} \gamma^k r(s_{t+k}) \mid s_t = s \right],$$

719 which requires  $\gamma < 1$  for convergence, optimal behavior is recovered only with  
720 respect to the *discounted MVT*, in which  $R$  (and in our case,  $R_t$ ) weights rewards by  
721 powers of  $\gamma$  [8].

722 In Fig. G.1(b-c) we perform a similar analysis to that of [8] and show that, on  
723 average over multiple distances between rewards,  $\lambda$ O-FB performs similarly to the  
724 discounted MVT for  $\gamma = 0.99$  and the standard MVT for  $\gamma = 1.0$ . An advantage  
725 of the  $\lambda$ O is that it is finite for  $\gamma = 1.0$  provided that  $\lambda < 1$ . Hence, as opposed  
726 to previous work, we can recover the standard MVT without the need to adjust for  
727 discounting.

728 Hyperparameters used are given in Table 1 (notation as in Algorithm 3).

## 729 H SAC

730 **Mitigating Value Overestimation** One well-known challenge in deep RL is that the use  
731 of function approximation to compute values is prone to overestimation. Standard  
732 approaches to mitigate this issue typically do so by using *two* value functions and  
733 either taking the minimum  $\min_{i \in \{1,2\}} Q_i^{\pi}(s, a)$  to form the Bellman target for a given  
734  $(s, a)$  pair [34] or combining them in other ways [35]. However, creating multiple  
735 networks is expensive in both computation and memory. Instead, we hypothesized  
736 that it might be possible to address this issue by using  $\lambda$ -based values. To test this  
737 idea, we modified the Soft Actor-Critic [SAC; 36] algorithm to compute  $\lambda$ Fs-based  
738 values by augmenting the soft value target  $\mathcal{T}_{soft}Q = r_t + \gamma \mathbb{E}V_{soft}(s_{t+1})$ , where

739  $V_{soft}(s_{t+1})$  is given by the expression

$$\mathbb{E}_{a_{t+1} \sim \pi(\cdot | s_{t+1})} \left[ \bar{Q}(s_{t+1}, a_{t+1}) + (\lambda - 1) \mathbf{w}^\top (\phi(s_t, a_t) \odot \varphi_\lambda(s_{t+1}, a_{t+1})) - \alpha \log \pi(a_{t+1} | s_{t+1}) \right]$$

740 A derivation as well as pseudocode for the modified loss is provided in Appendix D.5.  
 741 Observe that for  $\lambda = 1$ , we recover the standard SAC value target, corresponding to  
 742 an assumed stationary reward. We apply this modified SAC algorithm, which we  
 743 term  $\lambda$ -SAC to feature-based Mujoco continuous control tasks within OpenAI Gym  
 744 [37]. We found that concatenating the raw state and action observations  $\tilde{\phi}_t = [s_t, a_t]$   
 745 and normalizing them to  $[0, 1]$  make effective regressors to the reward. That is, we  
 746 compute base features as

$$\phi_t^b = \frac{\tilde{\phi}_t^b - \min_b \tilde{\phi}_t^b}{\max_b \tilde{\phi}_t^b - \min_b \tilde{\phi}_t^b},$$

747 where  $b$  indexes  $(s_t, a_t)$  within a batch. Let  $X \in [0, 1]^{B \times D}$  be the concatenated  
 748 matrix of features for a batch, where  $D = \dim(\mathcal{S}) + \dim(\mathcal{A})$ . Then,

$$\mathbf{w}_t = (X^\top X)^{-1} X^\top \mathbf{r},$$

749 where here  $\mathbf{r}$  denotes the vector of rewards from the batch. In addition to using  
 750 a fixed  $\lambda$  value, ideally we'd like an agent to adaptively update  $\lambda$  to achieve the  
 751 best balance of optimism and pessimism in its value estimates. Following [38],  
 752 we frame this decision as a multi-armed bandit problem, discretizing  $\lambda$  into three  
 753 possible values  $\{0, 0.5, 1.0\}$  representing the arms of the bandit. At the start of each  
 754 episode, a random value of  $\lambda$  is sampled from these arms and used in the value  
 755 function update. The probability of each arm is updated using the Exponentially  
 756 Weighted Average Forecasting algorithm [39], which modulates the probabilities  
 757 in proportion to a feedback score. As in [38], we use the difference in cumulative  
 758 (undiscounted) reward between the current episode  $\ell$  and the previous one  $\ell - 1$   
 759 as this feedback signal:  $R_\ell - R_{\ell-1}$ . That is, the probability of selecting a given  
 760 value of  $\lambda$  increases if performance is improving and decreases if it's decreasing.  
 761 We use identical settings for the bandit algorithm as in [38]. We call this variant  
 762  $\lambda$ -SAC. We plot the results for SAC with two critics (as is standard), SAC with one  
 763 critic, SAC with a single critic trained with  $\lambda$ F-based values (" $x$ -SAC" denotes SAC  
 764 trained with a fixed  $\lambda = x$ ), and  $\lambda$ -SAC trained on the HalfCheetah-v2 Mujoco  
 765 environment. This task was found by [38] to support "optimistic" value estimates  
 766 in that even without pessimism to reduce overestimation it was possible to perform  
 767 well. Consistent with this, we found that single-critic SAC matched the performance  
 768 of standard SAC, as did 1-SAC (which amounts to training a standard value function  
 769 with the auxiliary task of SF prediction). Fixing lower values of  $\lambda$  performed poorly,  
 770 indicating that over-pessimism is harmful in this environment. However,  $\lambda$ -SAC  
 771 eventually manages to learn to set  $\lambda = 1$  and matches the final performance of the  
 772 best fixed algorithms. We consider these results to be very preliminary, and hope to  
 773 perform more experiments on other environments. We also believe  $\lambda$ -SAC could be  
 774 improved by using the difference between the current episode's total reward and the  
 775 *average* of the total rewards from previous episodes  $R_\ell - (\ell - 1)^{-1} \sum_{i=1}^{\ell-1} R_i$  as a

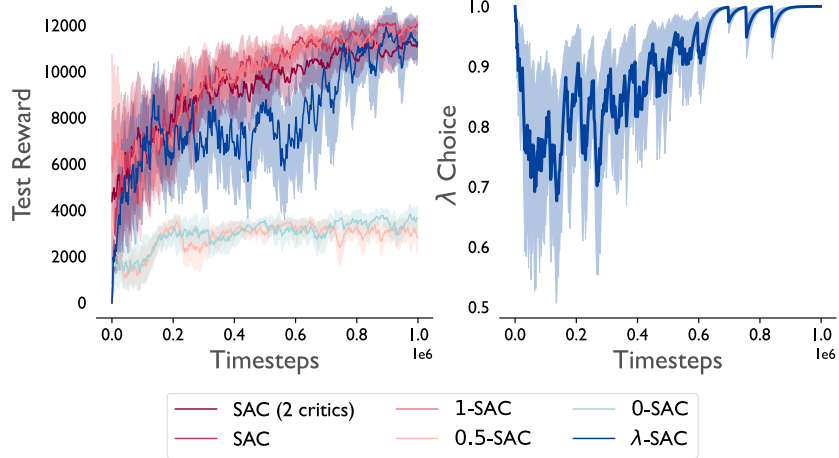

Figure H.1:  **$\lambda$ -SAC adaptively identifies the optimal  $\lambda$ .** Rewards are measure on the HalfCheetah task averaged over three random seeds, with shading indicating one unit of standard error.

776 more stable feedback signal for the bandit. There is also non-stationarity in the base  
 777 features due to the per-batch normalization, which could also likely be improved.  
 778 Hyperparameters are described in Table 2.

| Hyperparameter                         | Value                |
|----------------------------------------|----------------------|
| Collection Steps                       | 1000                 |
| Random Action Steps                    | 10000                |
| Network Hidden Layers                  | 256:256              |
| Learning Rate                          | $3 \times 10^{-4}$   |
| Optimizer                              | Adam                 |
| Replay Buffer Size                     | $1 \times 10^6$      |
| Action Limit                           | $[-1, 1]$            |
| Exponential Moving Avg. Parameters     | $5 \times 10^{-3}$   |
| (Critic Update:Environment Step) Ratio | 1                    |
| (Policy Update:Environment Step) Ratio | 1                    |
| Has Target Policy?                     | No                   |
| Expected Entropy Target                | $-\dim(\mathcal{A})$ |
| Policy Log-Variance Limits             | $[-20, 2]$           |
| Bandit Learning Rate*                  | 0.1                  |
| $\lambda$ Options*                     | $\{0, 0.5, 1.0\}$    |

Table 2: Hyperparameters for SAC Mujoco experiments. \*Only applicable to  $\lambda$ -SAC

## 779 I Replenishing Rewards

780 We list below a few candidate reward replenishment schemes, which are visualized  
 781 in Fig. I.1.

### Time elapsed rewards

$$r(s, t) = \lambda^{n(s,t)/m(s,t)} \bar{r}(s),$$

782 where  $m(s, t)$  is the time elapsed since the last visit to state  $s$ :

$$m(s, t) \triangleq t - \max\{j | s_{t+j} = s, 0 \leq j \leq t - 1\}.$$

783 Due to the max term in  $m(s, t)$ , the corresponding representation

$$\mathbb{E}_\pi \left[ \sum_{k=0}^{\infty} \gamma^k \lambda^{n(s,t)/m(s,t)} \mathbb{1}(s_{t+k} = s') \middle| s_t = s \right]$$

784 does not admit a closed-form recursion. However, we empirically tested a version of  
 785 this type of reward with  $Q_\lambda$ -learning in the TwoRooms environment, modified so that  
 786 the exponent on  $\lambda$  is  $n(s, t)/(0.1m(s, t))$ . This was done so that reward replenishes  
 787 at a slow rate, reducing the deviation from the standard diminishing setting. Episode  
 788 length was capped at  $H = 100$ . All other settings are identical to the  $Q_\lambda$  experiment  
 789 described in Appendix D. Results are presented in Fig. I.2 and a GIF is included in  
 790 the supplementary material.

#### Eligibility trace rewards

$$r(s, t) = \left( 1 - (1 - \lambda_d) \sum_{j=0}^{t-1} \lambda_r^{t-j} \mathbb{1}(s_{t+j} = s) \right) \bar{r}(s),$$

791 where  $\lambda_d, \lambda_r \in [0, 1]$  are diminishment and replenishment constants, respectively.  
 792 Denoting the corresponding representation by  $\Omega^\pi$ , i.e.,

$$\Omega^\pi(s, s') = \mathbb{E} \left[ \sum_{k=0}^{\infty} \gamma^k \left( 1 - (1 - \lambda_d) \sum_{j=0}^k \lambda_r^{k-j} \mathbb{1}(s_{t+j} = s') \right) \mathbb{1}(s_{t+k} = s') \middle| s_t = s \right],$$

793 we obtain the following recursion:

$$\begin{aligned} \Omega^\pi(s, s') &= \mathbb{1}(s = s') (\lambda_d - \gamma \lambda_r (1 - \lambda_d) \mathbb{E}_{s_{t+1} \sim p^\pi(\cdot|s)} M_{\gamma \lambda_r}^\pi(s_{t+1}, s') \\ &\quad + \gamma \mathbb{E}_{s_{t+1} \sim p^\pi(\cdot|s)} \Omega^\pi(s_{t+1}, s')), \end{aligned}$$

794 where  $M_{\gamma \lambda_r}^\pi$  denotes the successor representation of  $\pi$  with discount factor  $\gamma \lambda_r$ . This  
 795 representation could be learned by alternating TD learning between  $\Omega^\pi$  and  $M_{\gamma \lambda_r}^\pi$ .  
 796 We leave this to future work.

#### Total time rewards

$$r(s, t) = \lambda_d^{n(s,t)} \lambda_r^{n(s,t)-t} \bar{r}(s),$$

797 where  $\lambda_d, \lambda_r \in [0, 1]$  are diminishment and replenishment constants, respectively.  
 798 The corresponding representation is

$$P^\pi(s, s') = \mathbb{E} \left[ \sum_{k=0}^{\infty} \gamma^k \lambda_d^{n_t(s',k)} \lambda_r^{k-n_t(s',k)} \mathbb{1}(s_{t+k} = s') \middle| s_t = s \right],$$

799 which satisfies the following recursion:

$$\begin{aligned} P^\pi(s, s') &= \mathbb{1}(s = s') + \gamma (\lambda_d \mathbb{1}(s = s') + 1 \\ &\quad - \mathbb{1}(s = s')) (\lambda_r (1 - \mathbb{1}(s = s')) + \mathbb{1}(s = s')) \mathbb{E}_{s_{t+1} \sim p^\pi(\cdot|s)} P^\pi(s_{t+1}, s'). \end{aligned}$$

800 While neither the reward nor the representation are guaranteed to be finite,  $P^\pi$  could  
 801 be learned via TD updates capped at a suitable upper bound.

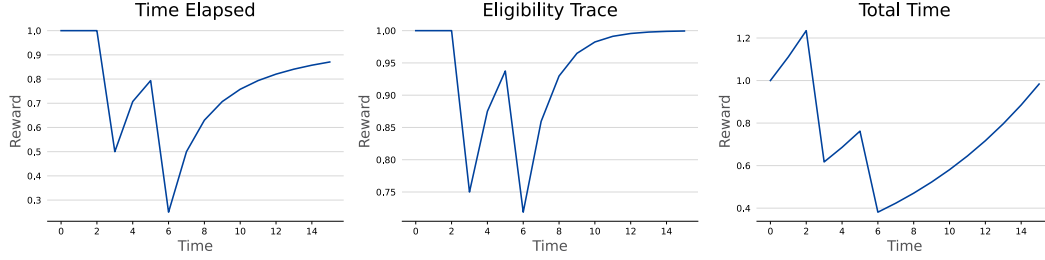

Figure I.1: **Visualizing three different replenishment schemes.** For all schemes,  $\bar{r}(s) = 1$  and visits to  $s$  are at  $t = 2, 5$ . (Left) The time elapsed reward with  $\lambda = 0.5$ ; (Middle) The eligibility trace reward with  $\lambda_r = \lambda_d = 0.5$ ; (Right) The total time reward with  $\lambda_d = 0.5, \lambda_r = 0.9$ .

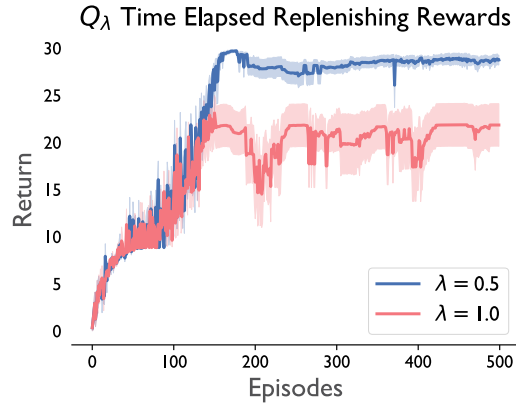

Figure I.2: **Performance on TwoRooms with replenishing rewards.** Return is averaged over five runs, with shading indicating one unit of standard error.

## 802 J $\lambda$ vs. $\gamma$

803 We now briefly discuss the interaction between the temporal discount factor  $\gamma$   
804 commonly used in RL and the diminishing utility rate  $\lambda$ . The key distinction  
805 between the two is that all rewards decay in value every time step with respect to  
806  $\gamma$ , regardless of whether a state is visited or not. With  $\lambda$ , however, decay is specific  
807 to each state (or  $(s, a)$  pair) and only occurs when the agent visits that state. Thus,  
808  $\gamma$  decays reward in a global manner which is independent of the agent's behavior,  
809 and  $\lambda$  decays reward in a local manner which dependent on the agent's behavior. In  
810 combination, they have the beneficial effect of accelerating convergence in dynamic  
811 programming (??). This indicates the potential for the use of higher discount factors  
812 in practice, as paired with a decay factor  $\lambda$ , similar (or faster) convergence rates  
813 could be observed even as agents are able to act with a longer effective temporal  
814 horizon.

## 815 K Compute Resources

816 The  $\lambda$ F-based experiments shown were run on a single NVIDIA GeForce GTX  
817 1080 GPU. The recurrent A2C experiments took roughly 30 minutes, base feature  
818 learning for policy composition took approximately 45 minutes,  $\lambda$ F learning for  
819 policy composition took approximately 10 hours, and the SAC experiments took

820 approximately 8 hours per run. The  $\lambda$ F training required roughly 30GB of memory  
821 due to the size of the dataset. All experiments in Section 6 and Appendix G were  
822 run on a single RTX5000 GPU and each training and evaluation run took about 30  
823 minutes. All other experiments were run on a 2020 MacBook Air laptop 1.1 GHz  
824 Quad-Core Intel Core i5 CPU and took less than one hour to train.

## 825 **L Broader Impact Statement**

826 We consider this work to be primarily of a theoretical nature pertaining to sequential  
827 decision-making primarily in the context of natural intelligence. While it may have  
828 applications for more efficient training of artificial RL agents, it is hard to predict  
829 long-term societal impacts.



## References

- [1] Daniel Kahneman and Amos Tversky. Prospect theory: An analysis of decision under risk. *Econometrica*, 47(2):263–292, 1979.
- [2] Matthew Rabin. Risk aversion and expected-utility theory: a calibration theorem. *Econometrica*, 68(5):1281–1292, 2000. doi: 10.2307/2999450.
- [3] Alex Pine, Ben Seymour, Jonathan P Roiser, Peter Bossaerts, Karl J Friston, H Valerie Curran, and Raymond J Dolan. Encoding of marginal utility across time in the human brain. *Journal of Neuroscience*, 29(30):9575–9581, 2009.
- [4] Martin L. Puterman. *Markov decision processes: discrete stochastic dynamic programming*. John Wiley and Sons, 2010.
- [5] Hermann Heinrich Gossen and Rudolph C Blitz. *The laws of human relations and the rules of human action derived therefrom*. Mit Press Cambridge, MA, 1983.
- [6] Kenneth J Arrow. The theory of risk-bearing: small and great risks. *Journal of risk and uncertainty*, 12:103–111, 1996.
- [7] John W Pratt. Risk aversion in the small and in the large. In *Uncertainty in economics*, pages 59–79. Elsevier, 1978.
- [8] Nathan Wispinski, Andrew Butcher, Kory Wallace Mathewson, Craig S Chapman, Matthew Botvinick, and Patrick M. Pilarski. Adaptive patch foraging in deep reinforcement learning agents. *Transactions on Machine Learning Research*, 2023. ISSN 2835-8856. URL <https://openreview.net/forum?id=a0T3nOP9sB>.
- [9] Sergey Shuvaev, Sarah Starosta, Duda Kvitsiani, Adam Kepecs, and Alexei Koulakov. R-learning in actor-critic model offers a biologically relevant mechanism for sequential decision-making. *Advances in neural information processing systems*, 33:18872–18882, 2020.
- [10] Peter Dayan. Improving generalization for temporal difference learning: The successor representation. *Neural Computation*, 5(4):613–624, 1993. doi: 10.1162/neco.1993.5.4.613.
- [11] Ted Moskovitz, Spencer R Wilson, and Maneesh Sahani. A first-occupancy representation for reinforcement learning. In *International Conference on Learning Representations*, 2022. URL <https://openreview.net/forum?id=JBAZe2yN6Ub>.
- [12] Ahmed Touati and Yann Ollivier. Learning one representation to optimize all rewards. *Advances in Neural Information Processing Systems*, 34:13–23, 2021.
- [13] Richard S. Sutton and Andrew G. Barto. *Reinforcement Learning: An Introduction*. The MIT Press, second edition, 2018. URL <http://incompleteideas.net/book/the-book-2nd.html>.
- [14] Kimberly L Stachenfeld, Matthew M Botvinick, and Samuel J Gershman. The hippocampus as a predictive map. *Nature neuroscience*, 20(11):1643–1653, 2017.
- [15] Andre Barreto, Shaobo Hou, Diana Borsa, David Silver, and Doina Precup. Fast reinforcement learning with generalized policy updates. *Proceedings of the National Academy of Sciences*, 117(48):30079–30087, 2020. ISSN 0027-8424. doi: 10.1073/pnas.1907370117. URL <https://www.pnas.org/content/117/48/30079>.
- [16] André Barreto, Will Dabney, Rémi Munos, Jonathan J Hunt, Tom Schaul, Hado P van Hasselt, and David Silver. Successor features for transfer in reinforcement learning. *Advances in neural information processing systems*, 30, 2017.
- [17] André Barreto, Diana Borsa, John Quan, Tom Schaul, David Silver, Matteo Hessel, Daniel Mankowitz, Augustin Židek, and Rémi Munos. Transfer in deep reinforcement learning using successor features and generalised policy improvement, 2019.
- [18] Léonard Blier and Yann Ollivier. The description length of deep learning models. *Advances in Neural Information Processing Systems*, 31, 2018.

- [19] Christopher JCH Watkins and Peter Dayan. Q-learning. *Machine learning*, 8:279–292, 1992.
- [20] Volodymyr Mnih, Adria Puigdomenech Badia, Mehdi Mirza, Alex Graves, Timothy Lillicrap, Tim Harley, David Silver, and Koray Kavukcuoglu. Asynchronous methods for deep reinforcement learning. In *International conference on machine learning*, pages 1928–1937. PMLR, 2016.
- [21] Arthur Juliani, Samuel Barnett, Brandon Davis, Margaret Sereno, and Ida Momennejad. Neuro-nav: a library for neurally-plausible reinforcement learning. *arXiv preprint arXiv:2206.03312*, 2022.
- [22] Sepp Hochreiter and Jürgen Schmidhuber. Long short-term memory. *Neural Computation*, 9(8):1735–1780, 1997.
- [23] Richard S. Sutton, Doina Precup, and Satinder Singh. Between mdps and semi-mdps: A framework for temporal abstraction in reinforcement learning. *Artificial Intelligence*, 112(1):181–211, 1999. URL <https://www.sciencedirect.com/science/article/pii/S0004370299000521>.
- [24] Ahmed Touati, Jérémy Rapin, and Yann Ollivier. Does zero-shot reinforcement learning exist? In *The Eleventh International Conference on Learning Representations*, 2023. URL [https://openreview.net/forum?id=MYEap\\_OcQI](https://openreview.net/forum?id=MYEap_OcQI).
- [25] Benjamin Y Hayden, John M Pearson, and Michael L Platt. Neuronal basis of sequential foraging decisions in a patchy environment. *Nature neuroscience*, 14(7):933–939, 2011.
- [26] Tehrim Yoon, Robert B Geary, Alaa A Ahmed, and Reza Shadmehr. Control of movement vigor and decision making during foraging. *Proceedings of the National Academy of Sciences*, 115(44):E10476–E10485, 2018.
- [27] Anthony S Gabay and Matthew AJ Apps. Foraging optimally in social neuroscience: computations and methodological considerations. *Social Cognitive and Affective Neuroscience*, 16(8):782–794, 2021.
- [28] Eric L. Charnov. Optimal foraging, the marginal value theorem. *Theoretical Population Biology*, 9(2):129–136, 1976. ISSN 0040-5809.
- [29] Peter Nonacs. State dependent behavior and the marginal value theorem. *Behavioral Ecology*, 12(1):71–83, 2001.
- [30] Ian Osband, Yotam Doron, Matteo Hessel, John Aslanides, Eren Sezener, Andre Saraiva, Katrina McKinney, Tor Lattimore, Csaba Szepesvari, Satinder Singh, et al. Behaviour suite for reinforcement learning. *arXiv preprint arXiv:1908.03568*, 2019.
- [31] Jimmy Lei Ba, Jamie Ryan Kiros, and Geoffrey E Hinton. Layer normalization. *arXiv preprint arXiv:1607.06450*, 2016.
- [32] Martin Riedmiller. Neural fitted q iteration—first experiences with a data efficient neural reinforcement learning method. In *Machine Learning: ECML 2005: 16th European Conference on Machine Learning, Porto, Portugal, October 3-7, 2005. Proceedings 16*, pages 317–328. Springer, 2005.
- [33] Peter Dayan and Geoffrey E Hinton. Feudal reinforcement learning. *Advances in neural information processing systems*, 5, 1992.
- [34] Scott Fujimoto, Herke van Hoof, and David Meger. Addressing function approximation error in actor-critic methods. In *Proceedings of the 35th International Conference on Machine Learning, ICML 2018, Stockholmsmässan, Stockholm, Sweden, July 10-15, 2018*, 2018.
- [35] Ted Moskowitz, Michael Arbel, Ferenc Huszar, and Arthur Gretton. Efficient wasserstein natural gradients for reinforcement learning, 2020.
- [36] Tuomas Haarnoja, Aurick Zhou, Pieter Abbeel, and Sergey Levine. Soft actor-critic: Off-policy maximum entropy deep reinforcement learning with a stochastic actor, 2018.

- 399 [37] Greg Brockman, Vicki Cheung, Ludwig Pettersson, Jonas Schneider, John Schulman, Jie Tang,  
400 and Wojciech Zaremba. Openai gym, 2016.
- 401 [38] Ted Moskovitz, Jack Parker-Holder, Aldo Pacchiano, Michael Arbel, and Michael Jordan. Tacti-  
402 cal optimism and pessimism for deep reinforcement learning. Advances in Neural Information  
403 Processing Systems, 34:12849–12863, 2021.
- 404 [39] Nicolo Cesa-Bianchi and Gábor Lugosi. Prediction, learning, and games. Cambridge university  
405 press, 2006.
